# Supplementary material
Source: HighWire-hosted journal article supplement (https://jpet.aspetjournals.org/highwire/filestream/152392/field_highwire_adjunct_files/0/1393_supp_data.pdf)
Supplement: 1393_supp_data.pdf [file 1393_supp_data.pdf]

## Supplemental Information for JPET-AR-2022-001393

### Initial pharmacological characterization of a major hydroxymetabolite of PF-5190457: inverse agonist/antagonist activity of PF-6870961 at the ghrelin receptor

Sara L. Deschaine<sup>1,2</sup>, Morten A. Hedegaard<sup>3</sup>, Claire L. Pince<sup>1,4</sup>, Mehdi Farokhnia<sup>1,5</sup>, Jacob E. Moose<sup>6</sup>, Ingrid A. Stock<sup>7</sup>, Sravani Adusumalli<sup>8</sup>, Fatemeh Akhlaghi<sup>8</sup>, James L. Houglund<sup>6,9,10</sup>, Agnieszka Sulima<sup>11,12</sup>, Kenner C. Rice<sup>11,12</sup>, George F. Koob<sup>4</sup>, Leandro F. Vendruscolo<sup>4</sup>, Birgitte Holst<sup>3</sup>, Lorenzo Leggio<sup>1,11,13,14\*</sup>

#### Supplementary Appendix S1. Inclusion and Exclusion Criteria

##### Inclusion criteria:

- Males or females 21-65 years old (inclusive)
- Heavy drinking (least 21 drinks per week for men or at least 14 drinks for women on average via the 90-day timeline follow-back done at screening)
- Negative urine drug screen and good health as confirmed by medical history, physical examination, electrocardiogram (EKG), blood/urine lab tests
- Female subjects must be of non-childbearing potential as defined by at least one of the following criteria:

1. Females 45 – 65 years old, who are menopausal, defined as follows:

Females who are between 45 – 55 years old will be considered menopausal if they satisfy all the following three requirements during screening:

- In amenorrhea, defined as absence of menstruation for the previous 12 months
- Negative urine pregnancy test
- Serum follicle-stimulating hormone concentration within the laboratory's reference range for postmenopausal females

Females who are between 56 – 65 years old are considered menopausal if they are in amenorrhea, defined as absence of menstruation for the previous 12 months before screening

OR

2. Females 21-65 years old, who have a documented hysterectomy and/or bilateral oophorectomy

*All other female subjects (including females with tubal ligations and females that do not have a documented hysterectomy) are considered to be of childbearing potential*

- Male subjects must use one of the following methods of contraception from the first dose of study medication and until 28 days after dosing:
  - a. Abstinence
  - b. A condom AND one of the following:
    - i. Vasectomy for more than 6 months
    - ii. Female partner who meets one of the following conditions
      - a. Has had a tubal ligation, hysterectomy, or bilateral oophorectomy
      - b. Is post-menopausal
      - c. Uses one of the following forms of contraception
        - Copper or hormonal containing intrauterine device
        - Spermicidal foam/gel/film/cream/suppository
        - Diaphragm with spermicide
        - Oral contraceptive
        - Injectable progesterone
        - Subdermal implant

*Exclusion criteria:*

- Interest in receiving treatment for heavy drinking

- Current Diagnostic and Statistical Manual of Mental Disorders-IV (DSM-IV) diagnosis (based on structured clinical interview for DSM-IV) of substance dependence (other than alcohol and/or nicotine);
- DSM-IV Axis I criteria for a lifetime diagnosis of schizophrenia, bipolar disorder, or other psychoses
- Active illness within the past 6 months of the screening visit that meet the DSM-IV criteria for a diagnosis of major depressive disorder or anxiety disorder; any history of attempted suicide. Clinically significant medical abnormalities (e.g., unstable hypertension, clinically significant EKG abnormalities, Creatinine  $\geq 2$  mg/dL, liver cirrhosis, aspartate aminotransferase or alanine transaminase  $> 3x$  the upper normal limit, hemoglobin  $<10.5$  g/dl)
- Heart rate  $>100$  at screening on two separate measurements
- Body Mass Index (BMI)  $\leq 18.5$  or anorexia
- BMI  $\geq 35$  kg/m<sup>2</sup>
- Exclusionary Medications:
- Naltrexone, acamprosate, alcohol dehydrogenase inhibitors, topiramate, gabapentin, ondansetron, benzodiazepines, beta-blockers, H2-blockers, and alpha-1 blockers, baclofen and barbiturates as well as hormone replacement therapy; medications and dietary/herbal supplements (e.g. St. John's wort) that interact with Cytochrome P450 3A4. All medications in the previous sentence are exclusionary if taken within 2 weeks of study medication administration.
- PF-5190457 is a substrate for P-glycoproteins (P-gp or encoded by ABCB1 gene) based on information from in vitro or animal models. Patients that are required to take the following inhibitors and inducers of P-gp are excluded unless the subject stops taking these agents for 2 weeks for P-gp inhibitors or 6 weeks for P-gp inducers before study medication administration:

- i. *Inhibitors:* Amiodarone, azithromycin, captopril, carvedilol, clarithromycin, conivaptan, cyclosporine, diltiazem, dronedarone, erythromycin, felodipine, itraconazole, ketoconazole, lopinavir and ritonavir, quercetin, quinidine, ranolazine, verapamil
- ii. *Inducers:* Avasimibe, carbamazepine, phenytoin, rifampin, St John's wort, tipranavir/ritonavir  
[From Drug Development and Drug Interactions: Table of Substrates, Inhibitors and Inducers, table 12, from  
<http://www.fda.gov/Drugs/DevelopmentApprovalProcess/DevelopmentResources/DrugInteractionsLabeling/ucm093664.htm#substrates>]

- History of epilepsy or alcohol-related seizures
- Patients who have diabetes and/or are treated with any drug with glucose lowering properties such as sulfonylurea, insulin, metformin, thiazolidinediones, dipeptidyl peptidase-4 inhibitors, or glucagon-like peptide-1 agonists (due to the glucose-lowering properties of PF-5190457 observed in healthy volunteers)
- History of alcohol-induced flushing reactions
- Clinically significant alcohol withdrawal symptoms, as assessed by a Clinical Institute Withdrawal Assessment of Alcohol Scale Revised score > 8 at screening
- Any other reason or clinical condition for which the principal investigator or the medical advisory investigator consider unsafe for a possible participant to participate in this study

**Supplementary Table 1: % Inhibition of Off-Target Binding and Enzymatic Activity of PF-6870961**

| Target                                 | Radioligand | % Inhibition at 100 nM | % Inhibition at 10000 nM |
|----------------------------------------|-------------|------------------------|--------------------------|
| <b><i>Binding</i></b>                  |             |                        |                          |
| A <sub>1</sub> (h)                     | Antagonist  | -8.5                   | -5.3                     |
| A <sub>2A</sub> (h)                    | Agonist     | 1.3                    | 5.8                      |
| A <sub>2B</sub> (h)                    | Antagonist  | -1.3                   | -30.2                    |
| A <sub>3</sub> (h)                     | Agonist     | -7.6                   | -5.6                     |
| α <sub>1</sub> (Non-selective)         | Antagonist  | 1.9                    | 7.9                      |
| α <sub>2</sub> (Non-selective)         | Antagonist  | -5.2                   | 1.8                      |
| β <sub>1</sub> (h)                     | Agonist     | 7.2                    | 5.7                      |
| AT <sub>1</sub> (h)                    | Antagonist  | -4.5                   | 0.7                      |
| AT <sub>2</sub> (h)                    | Agonist     | 2.4                    | 1.7                      |
| BZD                                    | Agonist     | -19.6                  | -17.6                    |
| B <sub>2</sub>                         | Agonist     | -2.9                   | 1.6                      |
| CB <sub>1</sub>                        | Agonist     | -6.4                   | -2.8                     |
| CB <sub>2</sub>                        | Agonist     | 2.9                    | 0.7                      |
| CCK <sub>1</sub>                       | Agonist     | 9.5                    | 13.7                     |
| CCK <sub>2</sub>                       | Agonist     | -0.6                   | -2.0                     |
| CRF <sub>1</sub>                       | Agonist     | -1.1                   | -3.3                     |
| D <sub>4.4</sub>                       | Antagonist  | 13.1                   | 43.5                     |
| ET <sub>A</sub>                        | Agonist     | -6.6                   | -4.0                     |
| ET <sub>B</sub>                        | Agonist     | -11.0                  | -26.0                    |
| GABA <sub>A1</sub>                     | Agonist     | -7.6                   | 6.9                      |
| GABA <sub>B(1b)</sub>                  | Antagonist  | -13.9                  | -1.1                     |
| GAL <sub>1</sub>                       | Agonist     | -3.2                   | -0.4                     |
| GAL <sub>2</sub>                       | Agonist     | -0.7                   | -2.1                     |
| AMPA                                   | Agonist     | -8.1                   | -11.4                    |
| kainate                                | Agonist     | 3.1                    | 37.9                     |
| NMDA                                   | Antagonist  | 2.2                    | 1.1                      |
| mGluR1                                 | Agonist     | -11.6                  | 7.3                      |
| mGluR5                                 | Agonist     | -1.6                   | -8.0                     |
| Glycine (strychnine-sensitive)         | Antagonist  | 15.9                   | 1.6                      |
| Glycine (strychnine-insensitive)       | Antagonist  | -2.9                   | -6.7                     |
| H <sub>1</sub>                         | Antagonist  | 3.4                    | 1.5                      |
| H <sub>2</sub>                         | Antagonist  | -1.5                   | 10.7                     |
| H <sub>3</sub>                         | Agonist     | -11.4                  | 9.1                      |
| CysLT <sub>1</sub> (LTD <sub>4</sub> ) | Agonist     | -1.5                   | 2.5                      |
| M (non-selective)                      | Antagonist  | 8.4                    | 39.8                     |
| M <sub>1</sub>                         | Antagonist  | 6.4                    | 19.2                     |
| M <sub>2</sub>                         | Antagonist  | -18.1                  | 9.1                      |
| M <sub>3</sub>                         | Antagonist  | -0.4                   | 4.8                      |
| NK <sub>1</sub>                        | Agonist     | -14.6                  | 8.1                      |
| NK <sub>2</sub>                        | Agonist     | -7.4                   | 14.5                     |
| NK <sub>3</sub>                        | Antagonist  | 7.6                    | 13.3                     |
| N neuronal α4β2                        | Antagonist  | 1.6                    | 0.2                      |
| N neuronal α7                          | Antagonist  | 0.5                    | 30.4                     |
| N muscle type                          | Antagonist  | -8.0                   | 3.8                      |
| δ (DOP)                                | Agonist     | 10.0                   | 10.7                     |
| κ (KOP)                                | Agonist     | -9.9                   | 8.5                      |
| μ (MOP)                                | Agonist     | 1.7                    | 12.8                     |
| Oxytocin                               | Agonist     | -0.5                   | 4.3                      |

|                                                    |            |       |       |
|----------------------------------------------------|------------|-------|-------|
| NOP                                                | Agonist    | 5.8   | 0.8   |
| PAF                                                | Agonist    | 1.1   | 6.6   |
| PCP                                                | Antagonist | 3.8   | 1.5   |
| GR                                                 | Agonist    | 7.3   | -9.8  |
| ER (non-selective)                                 | Agonist    | 4.9   | -3.6  |
| AR                                                 | Agonist    | 11.3  | -4.1  |
| TRH <sub>1</sub>                                   | Agonist    | -2.9  | -8.4  |
| VPAC <sub>2</sub>                                  | Agonist    | -6.3  | -12.1 |
| VPAC <sub>1</sub>                                  | Agonist    | -8.1  | -10.4 |
| V <sub>1a</sub>                                    | Agonist    | 7.8   | 5.0   |
| V <sub>1b</sub>                                    | Agonist    | -1.7  | 10.9  |
| Ca <sup>2+</sup> channel (L, dihydropyridine site) | Antagonist | -31.5 | -8.6  |
| Ca <sup>2+</sup> channel (L, diltiazem site)       | Antagonist | -1.5  | -8.5  |
| Ca <sup>2+</sup> channel (N)                       | Antagonist | 2.2   | 2.8   |
| K <sub>ATP</sub> channel                           | Antagonist | 6.6   | -1.3  |
| SK <sub>ca</sub> channel                           | Antagonist | -8.8  | -6.5  |
| Na <sup>+</sup> channel (site 2)                   | Antagonist | 11.6  | 8.2   |
| <b>Enzyme</b>                                      |            |       |       |
| Choline Acetyl Transferase                         |            | -4.0  | 46.4  |
| TXA <sub>2</sub> Synthetase                        |            | -1.1  | 15.2  |
| Constitutive NOS (endothelial)                     |            | -17.7 | 30.7  |
| Acetylcholinesterase (h)                           |            | 5.8   | 36.3  |
| MAO-A                                              |            | -0.1  | 2.9   |
| MAO-B                                              |            | -24.0 | -14.6 |

**Supplementary Table 2: %Inhibition of Dopamine, Serotonin, and Opioid Receptors and Related Transporters**

| Target         | Radioligand                 | % Inhibition at 100 nM | % Inhibition at 10 $\mu$ M |
|----------------|-----------------------------|------------------------|----------------------------|
| 5HT1A          | [ <sup>3</sup> H]8OH-DPAT   | 0.85 $\pm$ 4.01%       | 14.71 $\pm$ 0.99%          |
| 5HT2A          | [ <sup>3</sup> H]5-HT       | 14 $\pm$ 14%           | 0.50 $\pm$ 16.79%          |
| 5HT2C          | [ <sup>3</sup> H]5-HT       | 3.9 $\pm$ 5.6%         | 18.16 $\pm$ 0.09%          |
| DA D1          | [ <sup>3</sup> H]SCH 23390  | -4.3 $\pm$ 5.1%        | -7.0 $\pm$ 6.6%            |
| DA D2          | [ <sup>3</sup> H]YM-09151-2 | 0.89 $\pm$ 6.15%       | 9.58 $\pm$ 0.31%           |
| DA D3          | [ <sup>3</sup> H]YM-09151-2 | -3.0 $\pm$ 5.4%        | 10.57 $\pm$ 0.44%          |
| DA D4.4        | [ <sup>3</sup> H]YM-09151-2 | -2.2 $\pm$ 6.2%        | 22.3 $\pm$ 1.5%            |
| $\delta$ (DOP) | [ <sup>3</sup> H]DPDPE      | -2.7 $\pm$ 1.5%        | 3.36 $\pm$ 0.24%           |
| $\kappa$ (KOP) | [ <sup>3</sup> H]U69,593    | 5.7 $\pm$ 3.2%         | 11.8 $\pm$ 4.1%            |
| $\mu$ (MOP)    | [ <sup>3</sup> H]DAMGO      | 11.5 $\pm$ 4.3%        | 26.1 $\pm$ 3.7%            |
| DAT            | [ <sup>125</sup> I]RTI-55   | 16.1 $\pm$ 1.7%        | 17.5 $\pm$ 3.0%            |
| SERT           | [ <sup>125</sup> I]RTI-55   | 5.07 $\pm$ 0.91%       | 7.9 $\pm$ 2.4%             |
| NET            | [ <sup>125</sup> I]RTI-55   | 14.22 $\pm$ 0.58%      | 23.8 $\pm$ 1.5%            |

Data are expressed as the % inhibition of specific control binding. Numbers represent the means  $\pm$  range from two independent experiments, each conducted with at least triplicate determinations. Negative inhibition values indicate that more specific binding was measured in the presence of PF-6870961 than under control conditions

**Supplementary Table 3: Mean Plasma Concentration of PF-5190457 and PF-6870961**

|                  | 50 mg BID PF-5190457 |                    | 100 mg BID PF-6870961 |                    |
|------------------|----------------------|--------------------|-----------------------|--------------------|
|                  | PF-5190457 (ng/mL)   | PF-6870961 (ng/mL) | PF-5190457 (ng/mL)    | PF-6870961 (ng/mL) |
| <b>Day 1</b>     |                      |                    |                       |                    |
| <b>Pre-Dose</b>  | -                    | 2.06               | -                     | 2.34               |
| <b>Post-Dose</b> | 105.52               | 26.40              | 218.07                | 48.17              |
| <b>Day 2</b>     |                      |                    |                       |                    |
| <b>Pre-Dose</b>  | 21.26                | 10.94              | 41.01                 | 19.35              |
| <b>Post-Dose</b> | 106.57               | 33.92              | 260.34                | 74.13              |

BID = twice daily

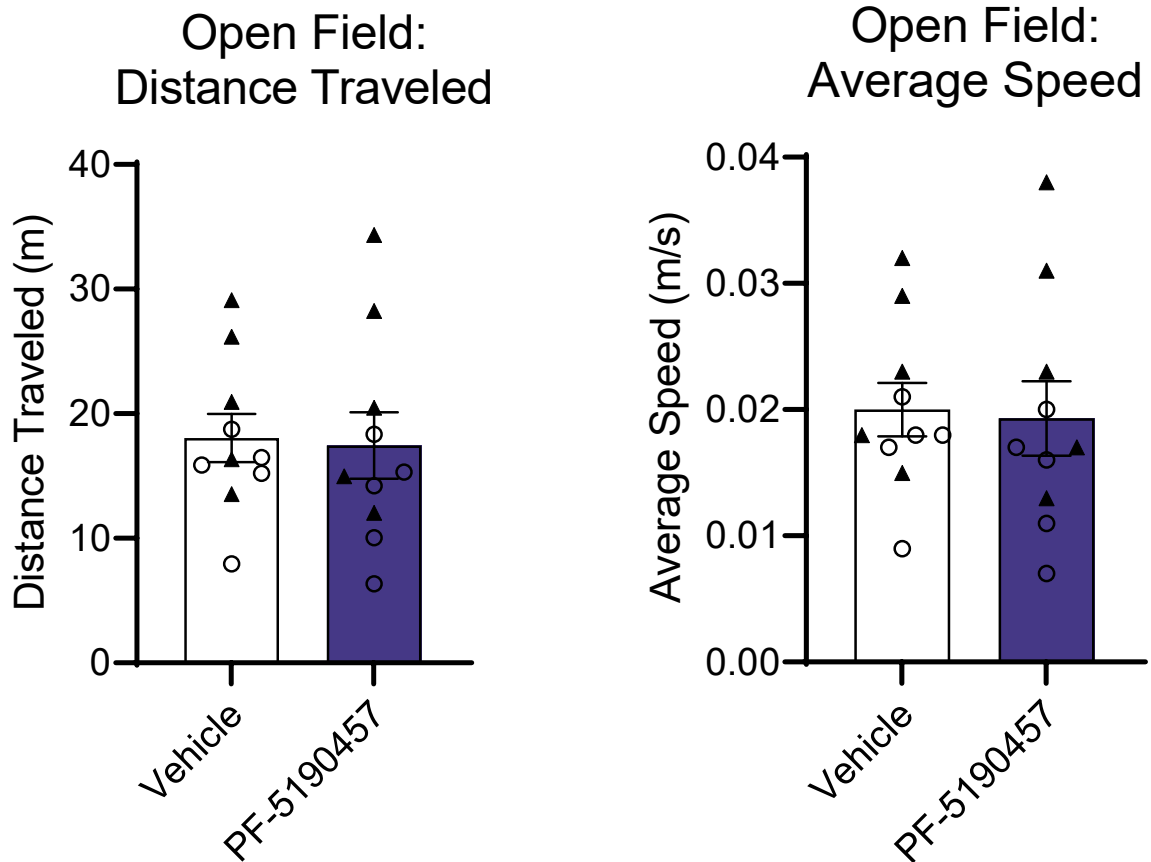

**Supplementary Figure S1.** PF-51904575 (30 mg/kg) had no effect on spontaneous locomotion in rats as measured by distance traveled (m) (**left**) and average speed (m/s) (**right**) in an open field test. Data are shown as mean ± S.E.M and analyzed using a two-tailed, paired t test.  $n = 10$ ,  $\circ$  = male rats,  $\blacktriangle$  = female rats.
